# Supplementary material for: Fluorescence lidar observations of wildfire smoke inside cirrus: A contribution to smoke-cirrus – interaction research
Source: Copernicus journal article supplement (doi:10.5194/acp-2021-1017), 2021-12-08
Supplement: Supplementary file [file acp-2021-1017-AC1-supplement.pdf]

## Reviewer 1

First of all we would like to thank reviewer for careful reading the manuscript and for appreciation of our work.

*The manuscript "Fluorescence lidar observations of wildfire smoke inside cirrus: A contribution to smoke-cirrus – interaction research" is very well written and presents a novel approach to combine Fluorescence and Multiwavelength Raman Lidar to better isolate vertically profiled smoke characteristics both in the free atmosphere as well as in cirrus clouds. The approach is quite empirical and interesting and should provide a useful tool in exploring a number of aerosol - cloud interactions and how smoke can mix and be modified in cloudy background environments.*

*One issue is that it is not clear what kind of quantitative errors we are propagating into the Fluorescence retrievals (both Fluorescence Backscatter and Smoke Microphysical). In particular, estimates of plausible errors are not shown in Tables 1 or 2 whereas the aerosol parameter errors are estimated.*

The question about uncertainty of the method is definitely very important. Uncertainties of  $\beta_F$  calculation depend on the chosen value of  $\sigma_R$  and on relative transmission of optical elements in fluorescence and nitrogen channels. These system parameters do not change with time. The relative sensitivity of PMTs, however, may change. Regular calibration of the channels demonstrates that corresponding uncertainty can be up to 10%. At high altitudes the statistical uncertainty becomes predominant.

We should recall, that when we estimate smoke concentration from fluorescence backscattering, using mean conversion factors from Eq.(4), the mentioned above systematical uncertainties disappear, because conversion factors and  $\beta_F$  are calculated with the same assumptions. The uncertainties of  $N$ ,  $S$ ,  $V$  estimation arise mainly due to variation of conversion factors for different smoke episodes. We estimate corresponding uncertainties to be below 50%, 25% and 20% for number, surface and volume density respectively.

In revised manuscript we added paragraph describing possible uncertainties of  $\beta_F$  calculation. Uncertainties are added to Table 1 and to the plots in the figures.
